# Supplementary material for: An uncertain future for the climate and health impacts of anthropogenic aerosols in Africa
Source: Copernicus journal article supplement (doi:10.5194/acp-25-11611-2025), 2025-09-30
Supplement: Supplementary file 1 [file acp-25-11611-2025-supplement.pdf]

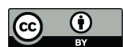

*Supplement of*

## **An uncertain future for the climate and health impacts of anthropogenic aerosols in Africa**

**Joe Adabouk Amooli et al.**

*Correspondence to:* Daniel M. Westervelt ([danielmw@ldeo.columbia.edu](mailto:danielmw@ldeo.columbia.edu))

The copyright of individual parts of the supplement might differ from the article licence.

African regional groupings in **Figure 1** are adapted from the World Health Organization (WHO) classifications, with minor adjustments to include all continental countries. Specifically, Sudan, South Sudan, and Somalia were reclassified from the WHO Eastern Mediterranean Region to Eastern Africa, and Libya, Egypt, Tunisia, Morocco, and Western Sahara were reclassified to Northern Africa. These countries are considered part of the Eastern Mediterranean Region in the original WHO classifications but are geographically part of the African continent.

**Table S1:** Summary of emission scenarios and their characteristics

| Scenario Group            | Scenario Name                    | Shorthand | Characteristics                                                                                                                                                                    |
|---------------------------|----------------------------------|-----------|------------------------------------------------------------------------------------------------------------------------------------------------------------------------------------|
| SSPs (Riahi et al., 2017) | SSP1-1.9                         | SSP119    | Sustainability pathway - rigorous air pollution control, low climate forcing, and minimal challenges in mitigation and adaptation                                                  |
|                           | SSP2-4.5                         | SSP245    | Middle-of-the-road pathway - moderate air pollution control, moderate climate forcing, moderate mitigation and adaptation challenges                                               |
|                           | SSP3-7.0                         | SSP370    | Regional rivalry - weak air pollution control, high climate forcing, significant challenges in both mitigation and adaptation.                                                     |
|                           | SSP5-8.5                         | SSP585    | Fossil-fueled development - very high climate forcing, strong air pollution control high socio-economic challenges for mitigation and low socio-economic challenges for adaptation |
| ECLIPSE (IIASA, 2023)     | Current Legislation              | ECL6 CLE  | Continuation of current legislation and existing regulatory frameworks.                                                                                                            |
|                           | Maximum Feasible Reduction       | ECL6 MFR  | Air pollution reductions through the implementation of advanced technologies and practices                                                                                         |
|                           | Sustainable Development Scenario | ECL6 SDS  | Targeted air pollution reductions for SDGs                                                                                                                                         |
| UNEP (UNEP, 2022)         | Baseline                         | UNEP BASE | Business-as-usual trajectory for Africa                                                                                                                                            |
|                           | Short-Lived Climate Pollutants   | UNEP SLCP | Focus on SLCP mitigation (black carbon, methane, and hydrofluorocarbons)                                                                                                           |
|                           | Agenda 2063                      | UNEP 2063 | Ambitious scenario aligned with long-term African sustainability goals                                                                                                             |

We conducted a comparison of the OsloCTM3 driven by CEDS21 anthropogenic emissions against PM<sub>2.5</sub> Surface Observations in 2019 from reference monitors at U.S. embassy locations in Africa and satellite-derived PM<sub>2.5</sub> from combined AOD retrievals from the NASA MODIS, MISR, and SeaWIFS with the GEOS-Chem model (**Figure S1**). These comparisons can be challenging for several reasons including coarse model spatial resolution and meteorological year consistency with measurement year, and thus should not be over-interpreted but instead viewed as a “sanity check”. The OsloCTM3 model broadly captures the seasonal cycle better in west Africa than in east Africa. This is also evident in the R<sup>2</sup>, RMSE, and MAE (**Table S2**). PM<sub>2.5</sub> levels in West Africa are heavily influenced by Harmattan winds that carry dust from the Sahara Desert (Amooli et al., 2024; Anuforum, 2007; Bahino et al., 2024), such that accurate PM<sub>2.5</sub> simulation in a model heavily relies on how well it represents atmospheric circulation.

However, PM<sub>2.5</sub> concentrations in East Africa are more heavily influenced by local emissions (Kalisa et al., 2023) and thus the accuracy of model climatologies depends largely on the precision of emissions inventories. Another reason could be the simplicity of the seasonal cycles. West Africa experiences only two distinct seasons: the rainy season and the dry season. However, East Africa's rainfall patterns are generally more variable due to complex large-scale processes, resulting in boreal summer, spring, and autumn seasons (Nicholson, 2017). The model underestimates surface PM<sub>2.5</sub> observations in Kampala and Kigali, and overestimates in Dakar. The OsloCTM3 model at its native 2.25° latitude by 2.25° longitude resolution performs best in Accra, Ouagadougou, Abidjan, Abuja, Cairo, and N'Djamena with ranging from 0.48 to 0.76 and MAE ranging from 5.7 µg m<sup>-3</sup> to 23.8 µg m<sup>-3</sup>. The model performs worst in Kampala, Nairobi, Kigali, Addis Ababa, and Dakar, with R<sup>2</sup> ranging from 0.002 to 0.39. The satellite PM<sub>2.5</sub> agrees well with surface observations in Accra, Ouagadougou, Abidjan, Addis Ababa, and N'Djamena with R<sup>2</sup> ranging from 0.84 to 0.93. The model and the satellite both agree in Accra, Ouagadougou, Abidjan, Addis Ababa, Kigali, and N'Djamena with R<sup>2</sup> ranging from 0.43 to 0.72 and MAE ranging from 3.2 µg m<sup>-3</sup> to 13.3 µg m<sup>-3</sup>. The downscaled resolutions perform similarly to the native resolution, with performance metrics of the same order of magnitude, though slightly better over Africa overall. However, at the city level, performance varies by location.

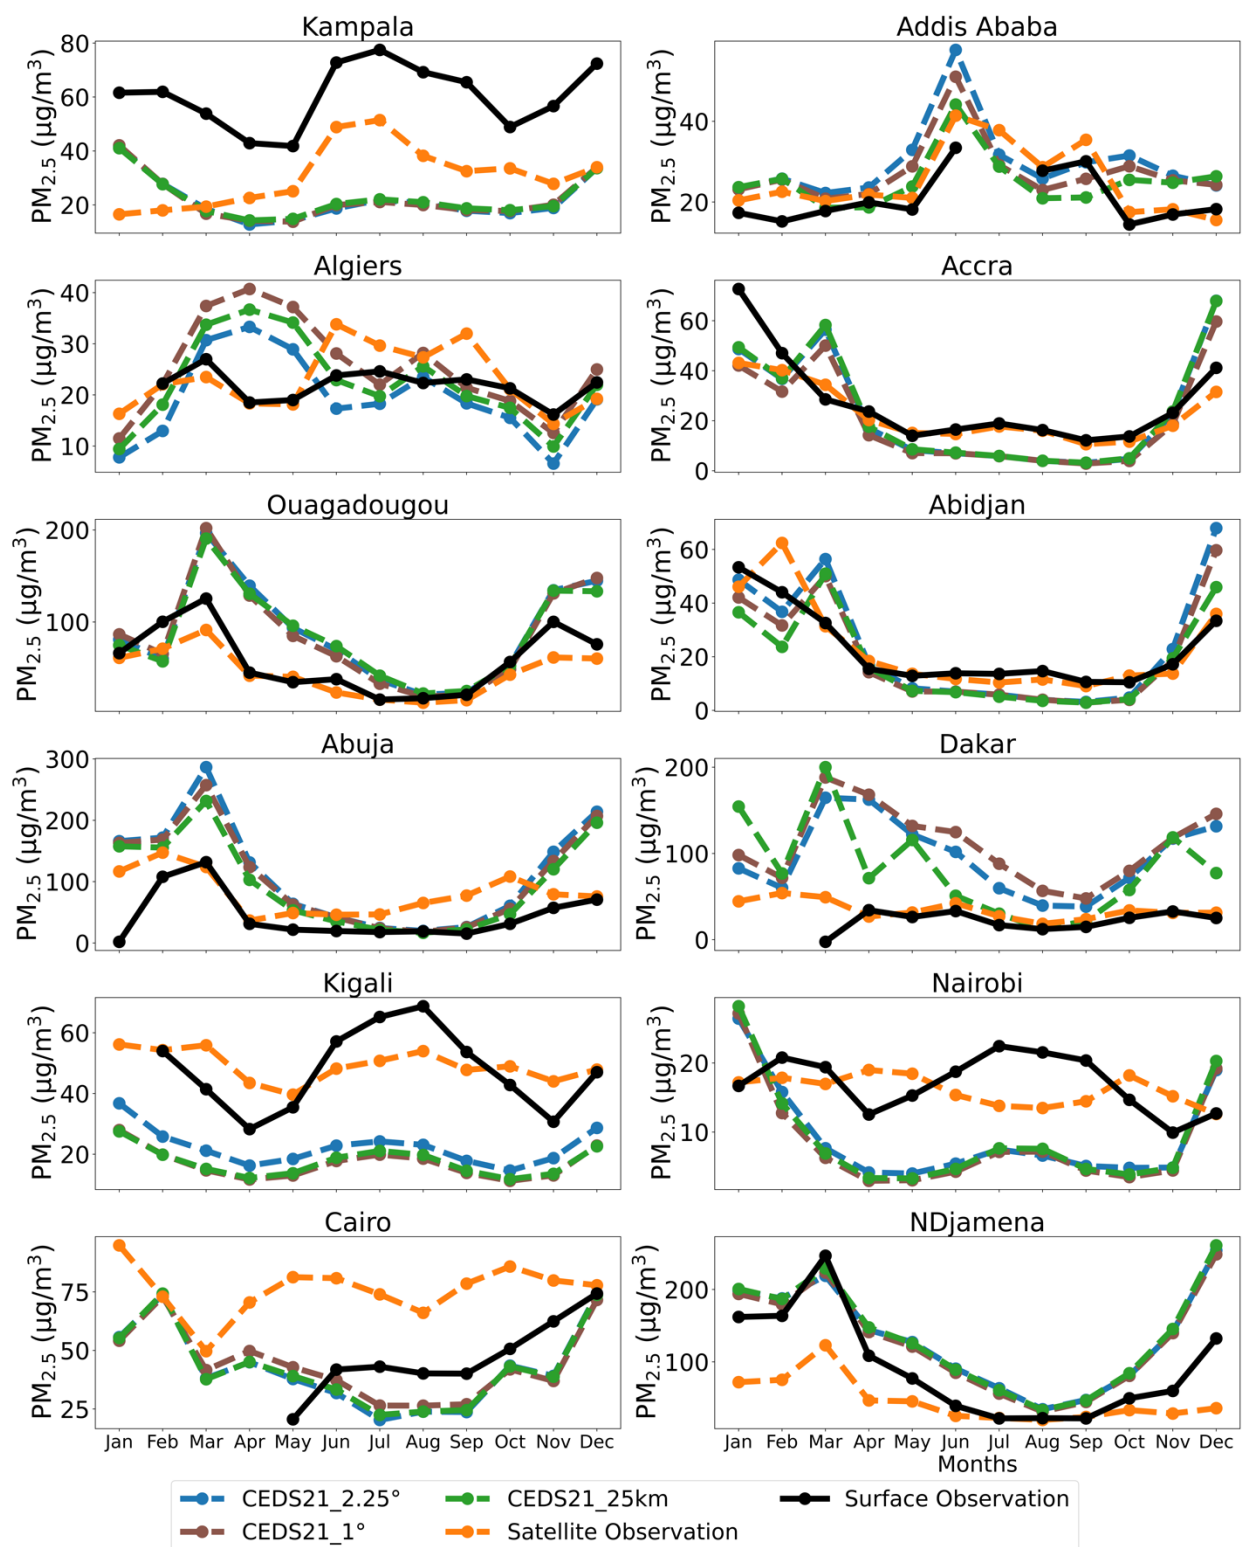

**Figure S1:** Evaluation of OsloCTM3 driven by CEDS21 anthropogenic emissions against PM<sub>2.5</sub> Surface Observations in 2019

**Table S2:** Evaluation of OsloCTM3 (native 2.25° latitude by 2.25° longitude resolution) and satellite-derived PM<sub>2.5</sub> against surface observations in 2019

| U.S. Embassy<br>Location | R <sup>2</sup> |           |                       | RMSE (µg m <sup>-3</sup> ) |           |                       | MAE (µg m <sup>-3</sup> ) |           |                       |
|--------------------------|----------------|-----------|-----------------------|----------------------------|-----------|-----------------------|---------------------------|-----------|-----------------------|
|                          | model          | satellite | model vs<br>satellite | model                      | satellite | model vs<br>satellite | model                     | satellite | model vs<br>satellite |
| <b>Kampala</b>           | 0.20           | 0.41      | 0.05                  | 10.01                      | 8.67      | 10.64                 | 8.91                      | 7.06      | 8.98                  |
| <b>Addis Ababa</b>       | 0.39           | 0.88      | 0.53                  | 4.79                       | 2.15      | 5.26                  | 3.64                      | 1.55      | 3.98                  |
| <b>Algiers</b>           | 0.09           | 0.03      | 0.02                  | 2.75                       | 2.85      | 6.19                  | 2.17                      | 2.29      | 5.36                  |
| <b>Accra</b>             | 0.55           | 0.84      | 0.72                  | 11.58                      | 6.81      | 5.73                  | 7.53                      | 4.29      | 4.29                  |
| <b>Ouagadougou</b>       | 0.53           | 0.93      | 0.59                  | 23.89                      | 9.73      | 15.30                 | 19.64                     | 7.74      | 12.33                 |
| <b>Abidjan</b>           | 0.66           | 0.87      | 0.55                  | 8.06                       | 5.03      | 10.98                 | 5.74                      | 3.44      | 6.89                  |
| <b>Abuja</b>             | 0.62           | 0.36      | 0.32                  | 23.84                      | 30.92     | 28.05                 | 15.81                     | 23.38     | 23.38                 |
| <b>Dakar</b>             | 0.01           | 0.03      | 0.09                  | 10.94                      | 10.79     | 10.66                 | 9.17                      | 9.01      | 9.17                  |
| <b>Kigali</b>            | 0.17           | 0.01      | 0.43                  | 11.61                      | 12.69     | 3.94                  | 9.98                      | 11.06     | 3.23                  |
| <b>Nairobi</b>           | 0.002          | 0.06      | 0.01                  | 3.89                       | 3.77      | 2.06                  | 3.46                      | 3.15      | 1.93                  |
| <b>Cairo</b>             | 0.48           | 0.20      | 0.06                  | 10.87                      | 13.49     | 11.90                 | 8.94                      | 11.80     | 9.74                  |
| <b>N'Djamena</b>         | 0.76           | 0.89      | 0.46                  | 33.71                      | 22.31     | 21.32                 | 23.83                     | 17.03     | 13.30                 |
| <b>Africa-average</b>    | 0.37           | 0.46      | 0.32                  | 13.00                      | 10.77     | 11.00                 | 9.90                      | 8.48      | 8.55                  |

The modelled AOD for 2019 is compared with a 5-year (2017-2022, excluding Covid year 2020) average MODIS AOD (**Figure S2**), considering the substantial year-to-year variability in MODIS data, particularly after 2010 (Vogel et al., 2022). The R<sup>2</sup> value between the model and MODIS Aqua is 0.36, with RMSE and MAE of 0.11 and 0.08 respectively. This suggests that the model captures a modest portion of the variability in MODIS Aqua AOD, indicating potential limitations in the model's representation of factors influencing AOD.

The overall difference between OsloCTM3 and MODIS Aqua AOD is -6 %. A previous study by Lund et al. (2023) found that the OsloCTM3 simulated global mean AOD is approximately 20 % lower than that derived from MODIS Aqua. However, the study also noted that the model, with CEDS21 emissions, better captures observed global and regional trends compared to using CEDS emissions. Additionally, Lund et al. (2018) reported improved agreement between the OsloCTM3 model output and ground-based Aerosol Robotic Network (AERONET) observations for the year 2010.

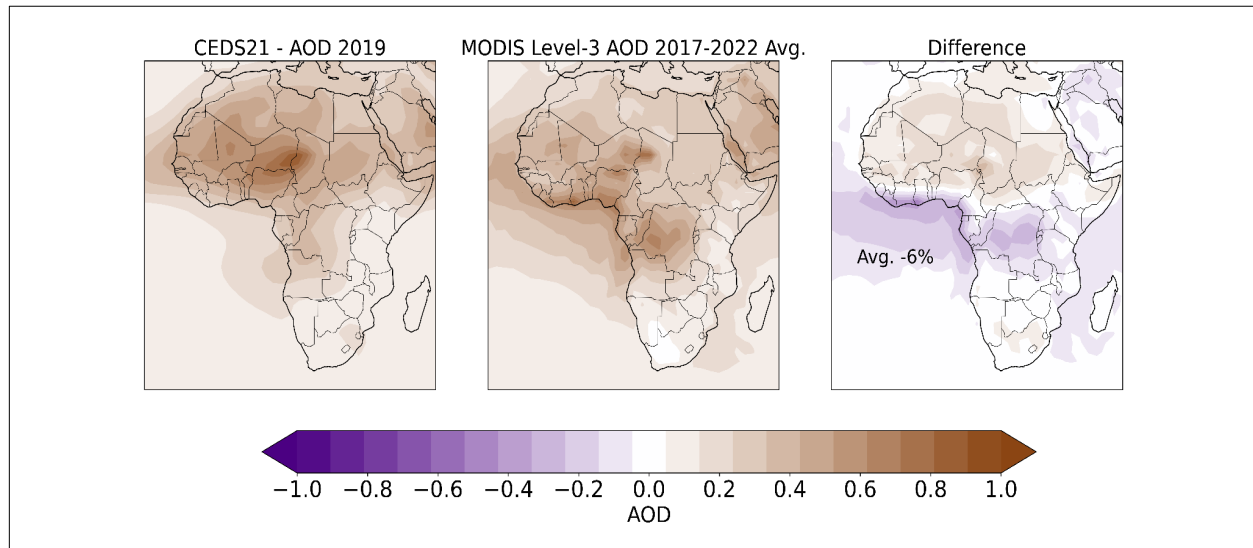

**Figure S2:** Evaluation of OsloCTM3 driven by CEDS21 anthropogenic emissions against MODIS Level-3 2017-2022 average AOD, excluding Covid year 2020.

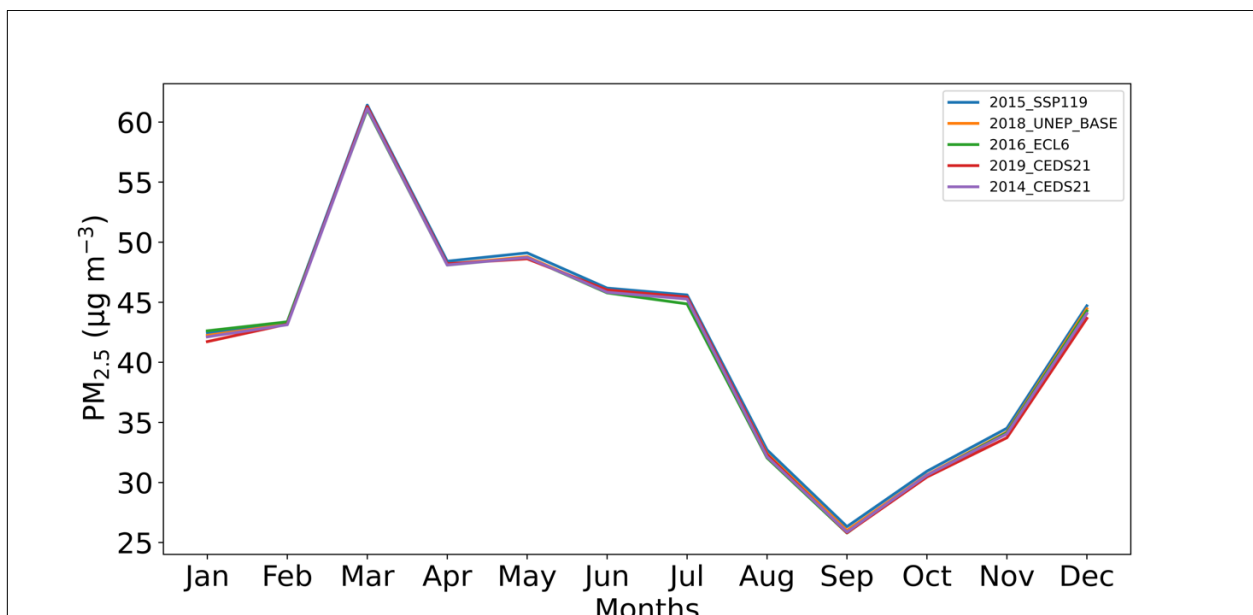

**Figure S3:** Comparison of Differences in Emission Inventories (2015-2018)

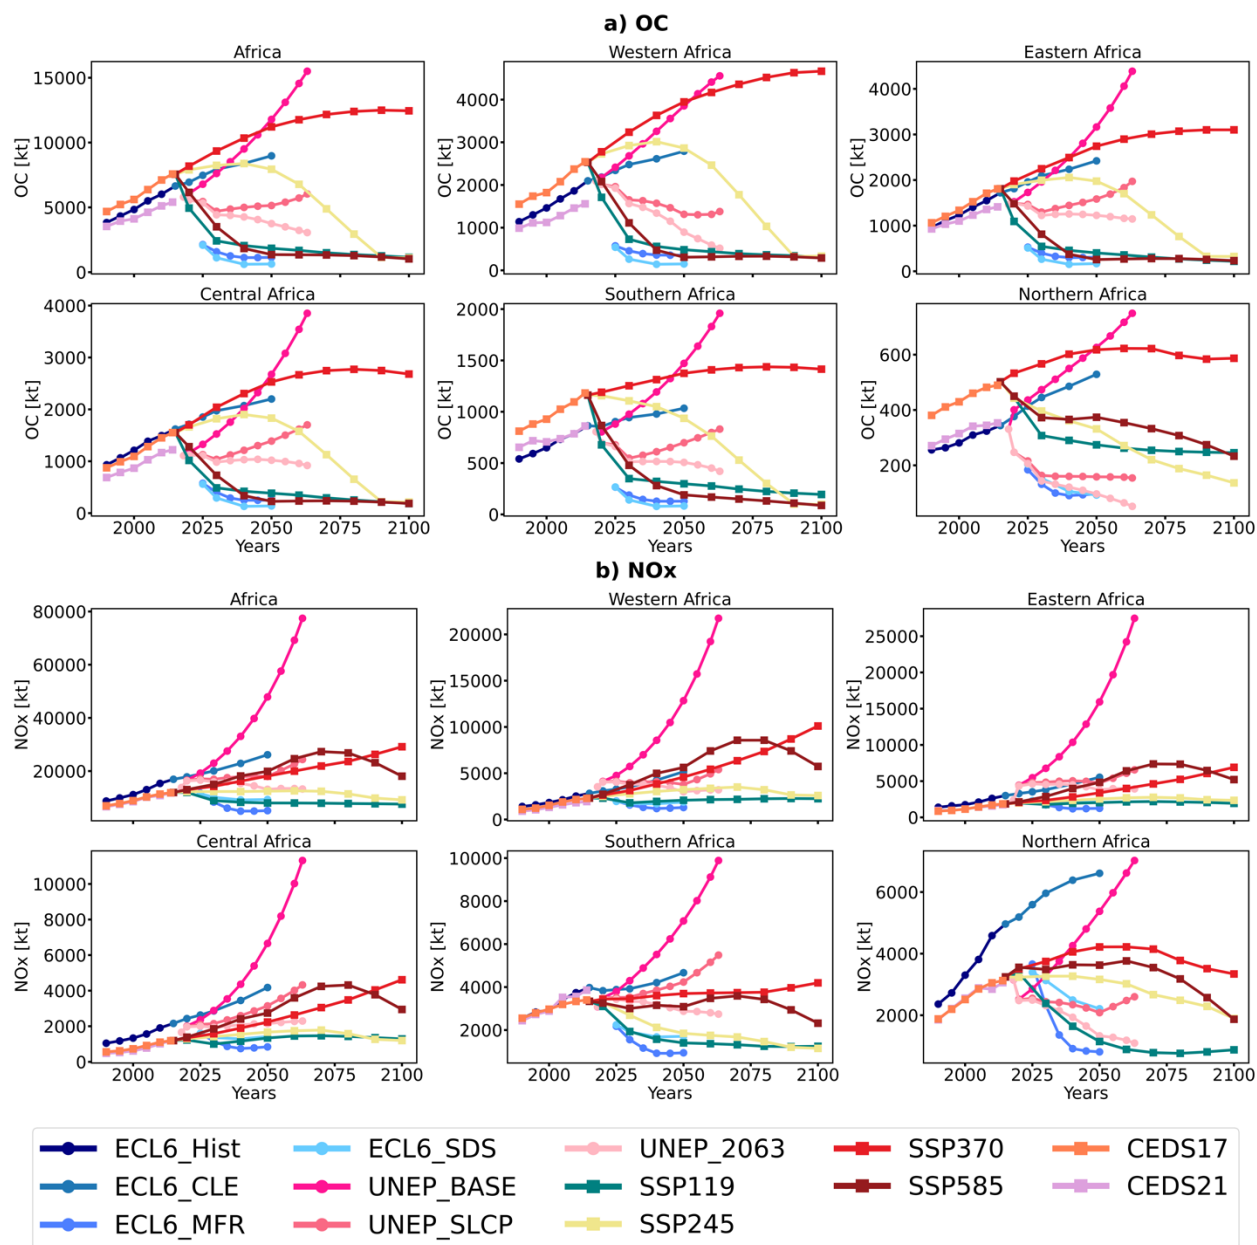

**Figure S4:** Large spread and regional heterogeneity in projected air pollution emissions in sub-Saharan Africa, shown for a) OC and b) NO<sub>x</sub>. Note: The y-axis scales vary between regions. ECL6\_Hist represents historical emissions from the ECLIPSE Version 6b inventory. CEDS17 and CEDS21 represent historical emissions from the CEDS versions 2017 and 2021, respectively.

BC emissions are projected to increase under SSP245 in Western, Central, and Eastern Africa, driven by the residential, transportation, and industrial sectors (**Figure S6**). However, BC emissions are expected to decrease under SSP119, driven by reductions in the residential, energy, waste, and transportation sectors. Under ECL6 SDS, BC emissions are projected to decrease across most regions, driven by reductions in the residential, transportation, and

agriculture sectors, except in Southern Africa, where emissions will be driven by the residential, transportation, and industrial sectors. BC emissions are also projected to decrease under UNEP SLCP (in Western, Eastern, and Northern Africa) due to reductions in the residential, energy, industrial, and waste sectors, and under UNEP 2063, driven by reductions in the residential, energy, industrial, waste, and agriculture sectors.

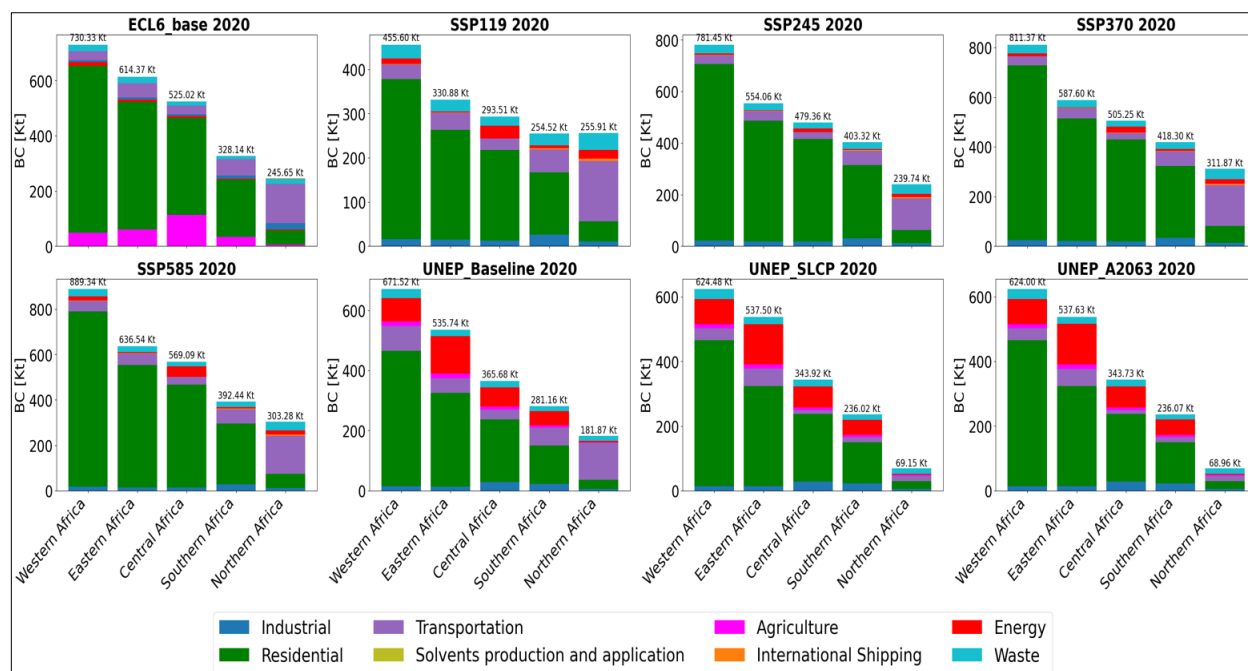

**Figure S5:** Sectoral Contributions to BC in 2020 across all scenarios. ECL6 MFR and ECL6 SDS start with ECL6 baseline

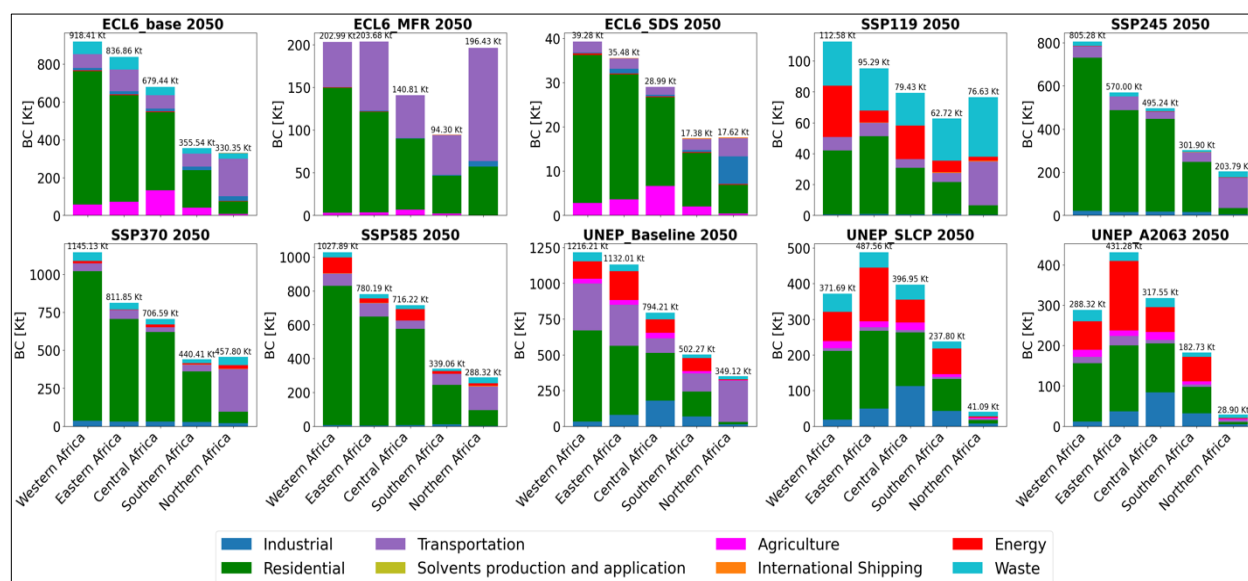

**Figure S6:** Sectoral Contributions to BC in 2050 across all scenarios



SO<sub>2</sub> emissions are projected to increase across all sub-regions by 2050 under the UNEP SLCP and UNEP 2063 scenarios, driven by the industrial and energy sectors (**Figure S8**). Additionally, SO<sub>2</sub> emissions are projected to increase under SSP119 (except in Western and Northern Africa) and SSP245 (except in Southern and Northern Africa), largely driven by the industrial sector. Under the ECL6 SDS and ECL6 MFR scenarios, SO<sub>2</sub> emissions are projected to slightly increase by 2050, driven by emissions from the industrial, energy, and transportation sectors.

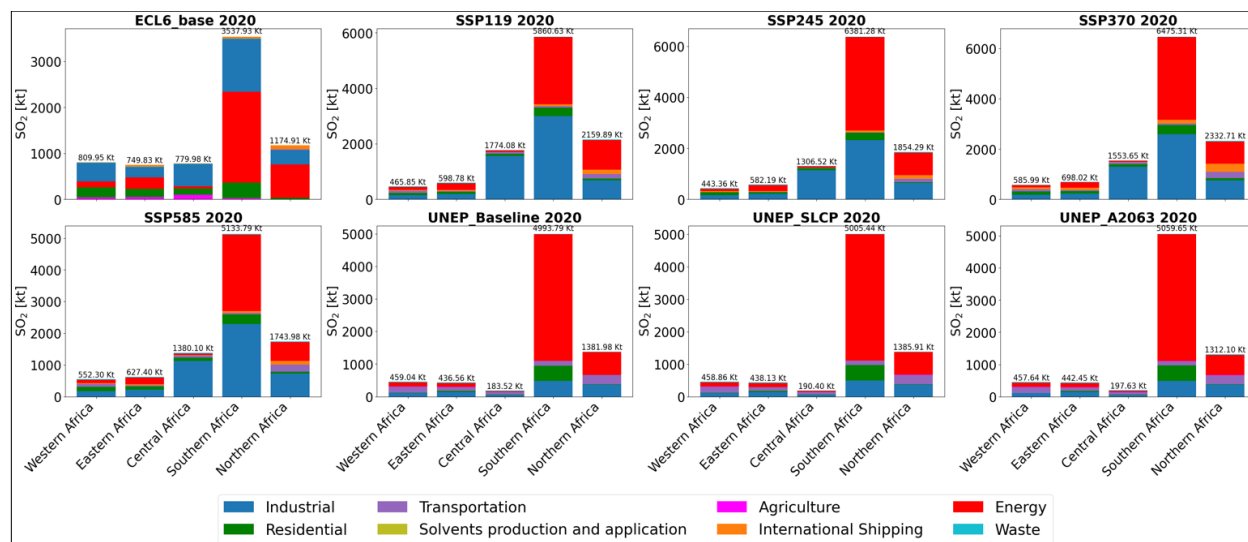

**Figure S7:** Sectoral Contributions to SO<sub>2</sub> in 2020 across all scenarios, ECL6 MFR and ECL6 SDS start with ECL6 baseline

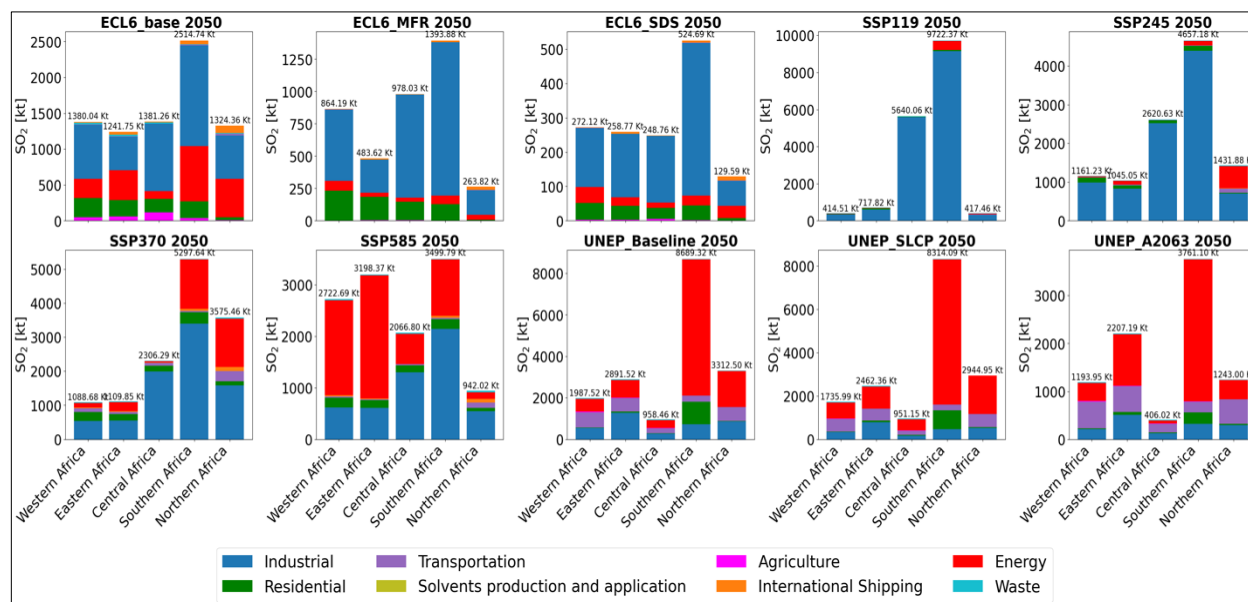

**Figure S8:** Sectoral Contributions to SO<sub>2</sub> in 2050 across all scenarios

The residential sector is the dominant contributor of OC emissions in both 2020 and 2050 in sub-Saharan Africa under the SSPs, UNEP, and ECL6. Under the SSPs, the residential sector is followed by waste; under the UNEP, it is followed by waste, energy, transportation, and agricultural waste burning on fields; and under ECL6, it is followed by agricultural waste burning on fields and waste (Figure S9). Similarly, the transportation sector is the dominant contributor to NOx emissions in both 2020 and 2050 in sub-Saharan Africa under both the UNEP and SSP scenarios, while the residential sector is the largest contributor under the ECL6 CLE scenario (Figure S10). Notably, the international shipping sector contributes significantly under the SSPs but is muted in the UNEP Baseline and ECL6 scenarios.

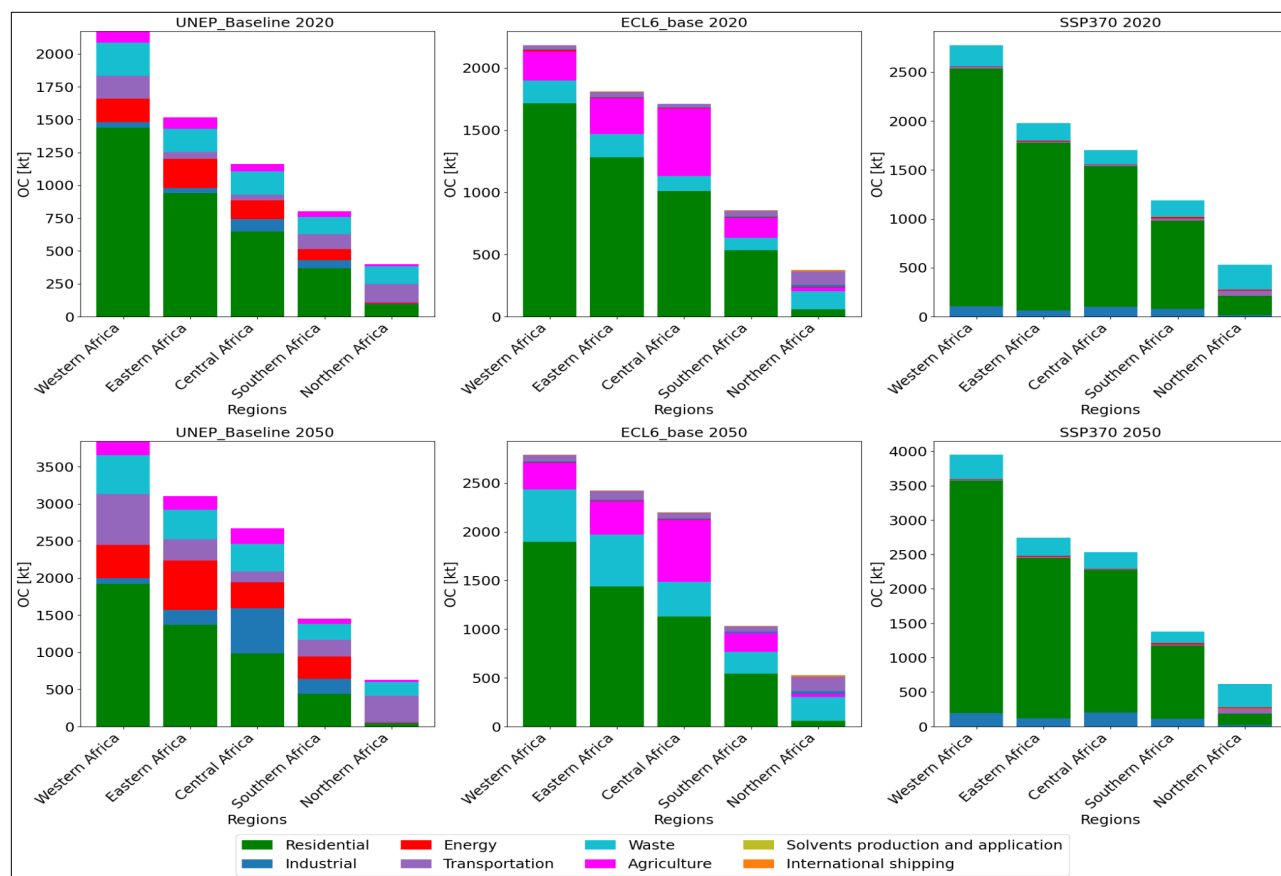

**Figure S9:** Sectoral Contributions to OC in 2020 (upper panel) and 2050 (lower panel) across increasing scenarios

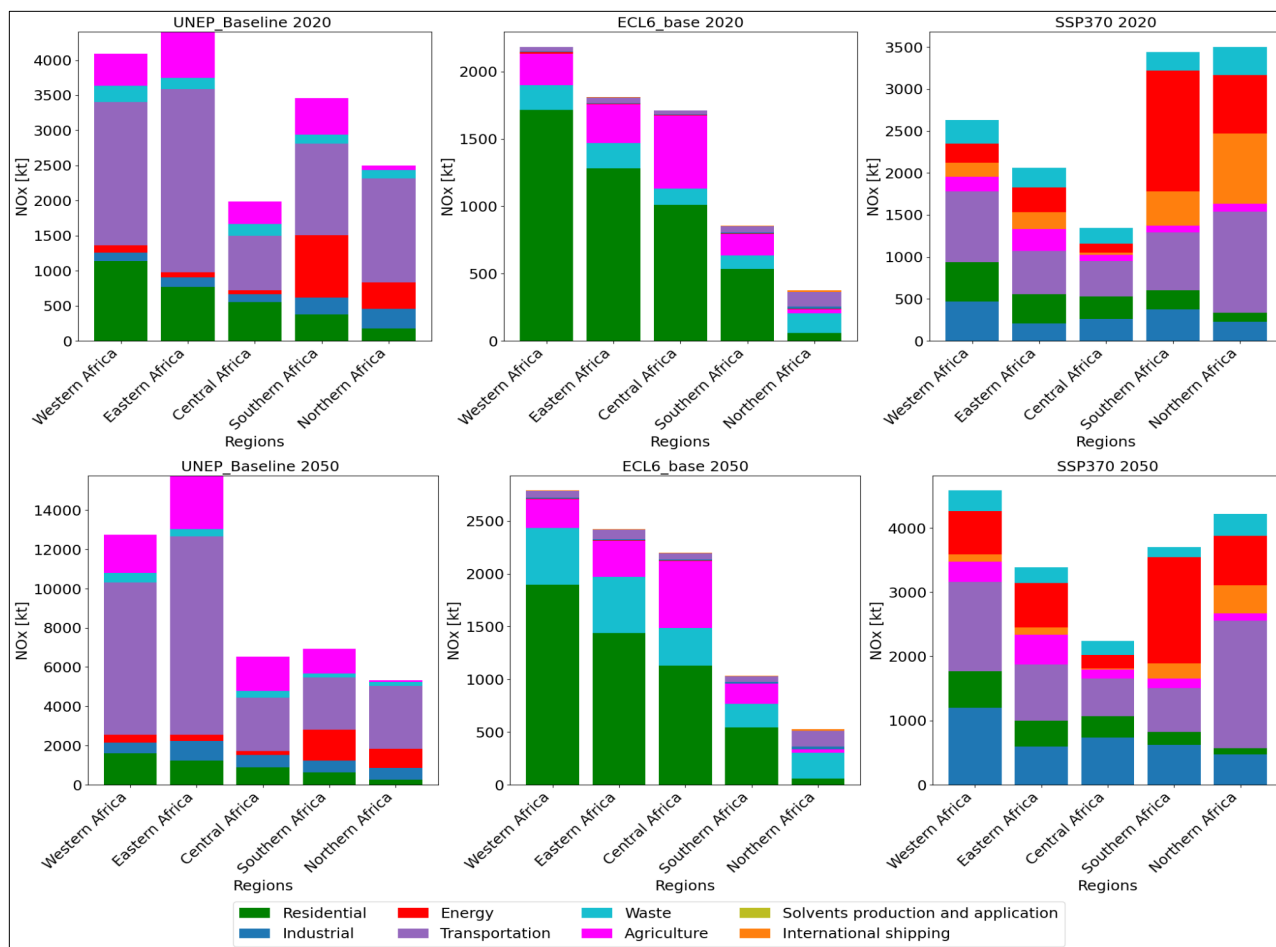

**Figure S10:** Sectoral Contributions to NO<sub>x</sub> in 2020 (upper panel) and 2050 (lower panel) across increasing scenarios

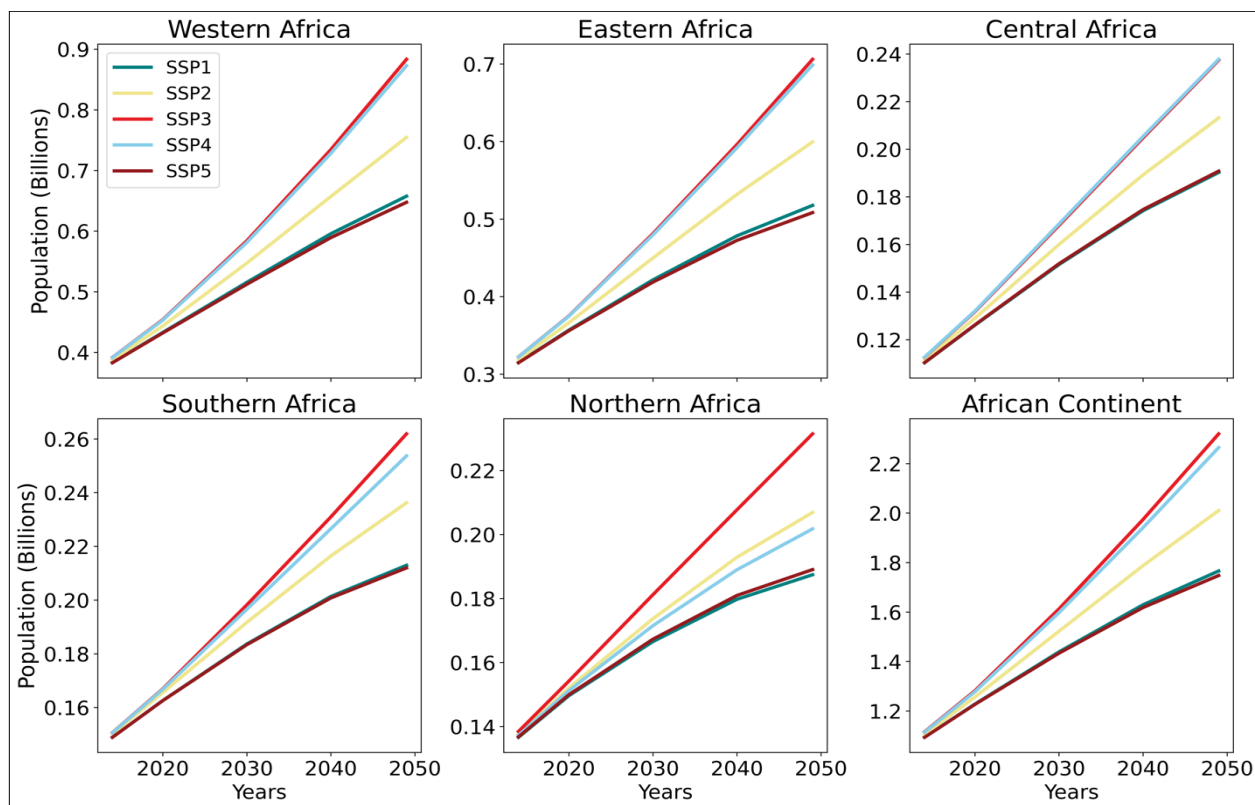

**Figure S11:** Population change by region and scenario between 2014 and 2050.

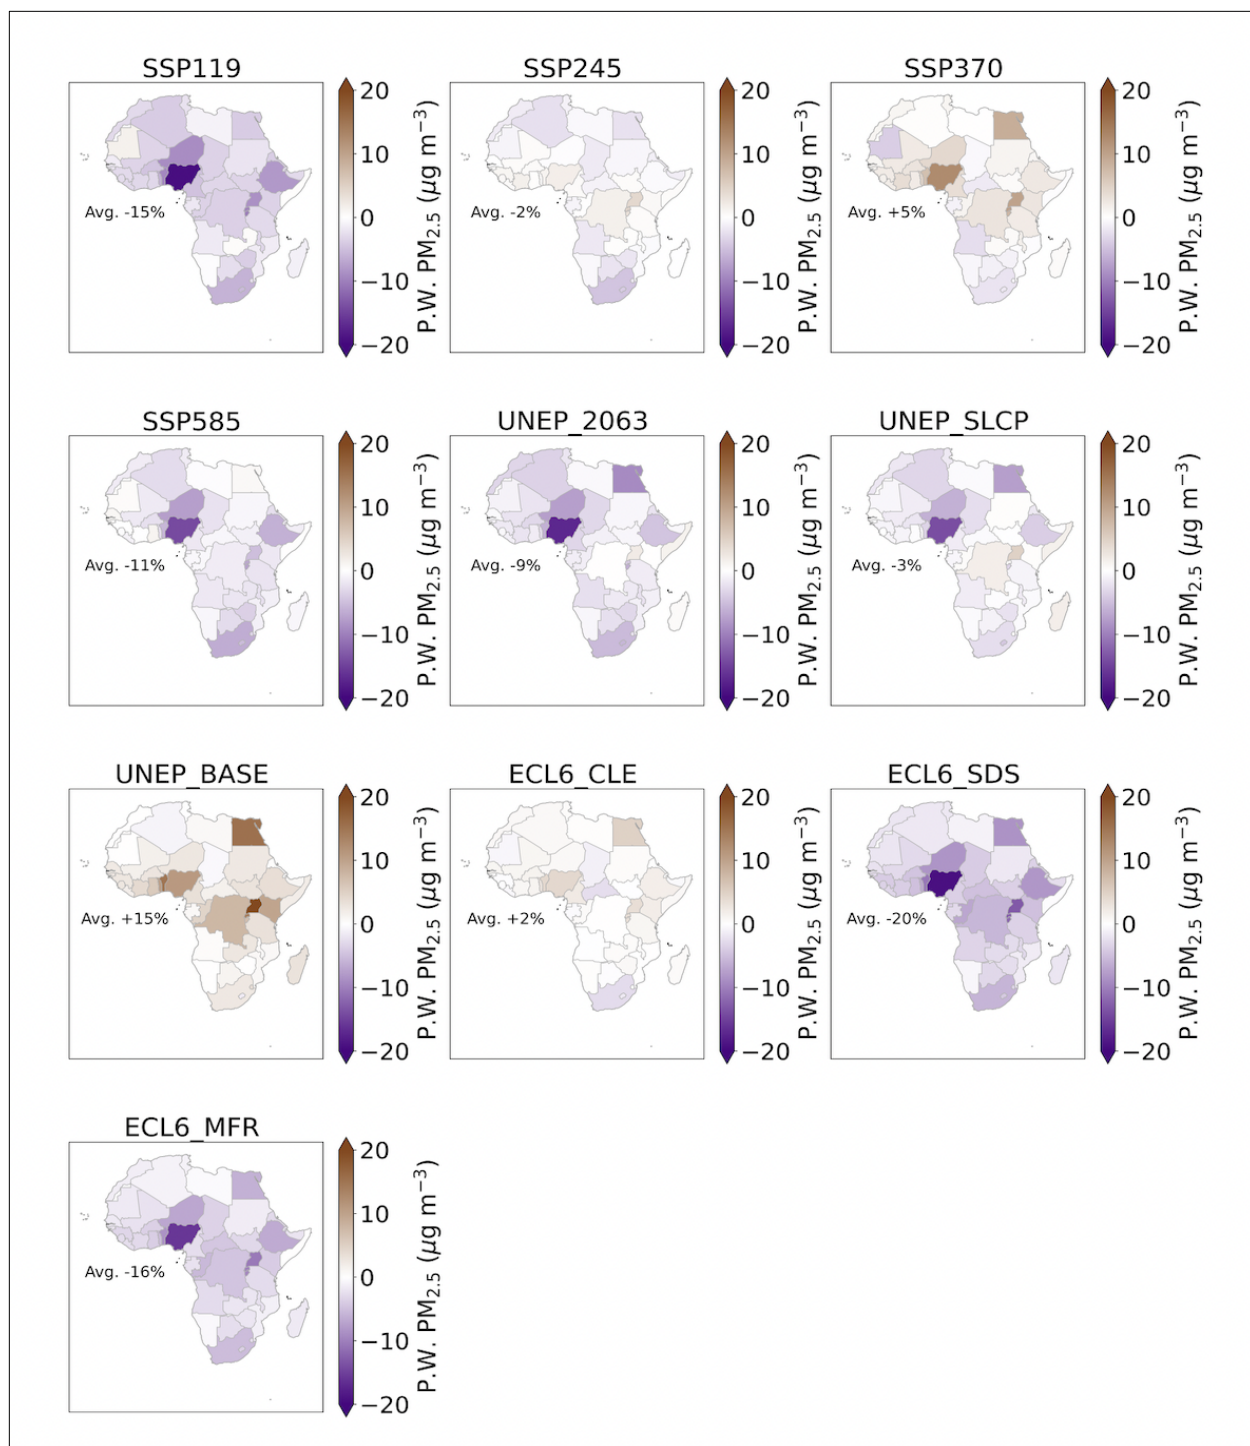

**Figure S12:** Difference in population-weighted  $PM_{2.5}$  between 2015-2018 and 2050 across all scenarios

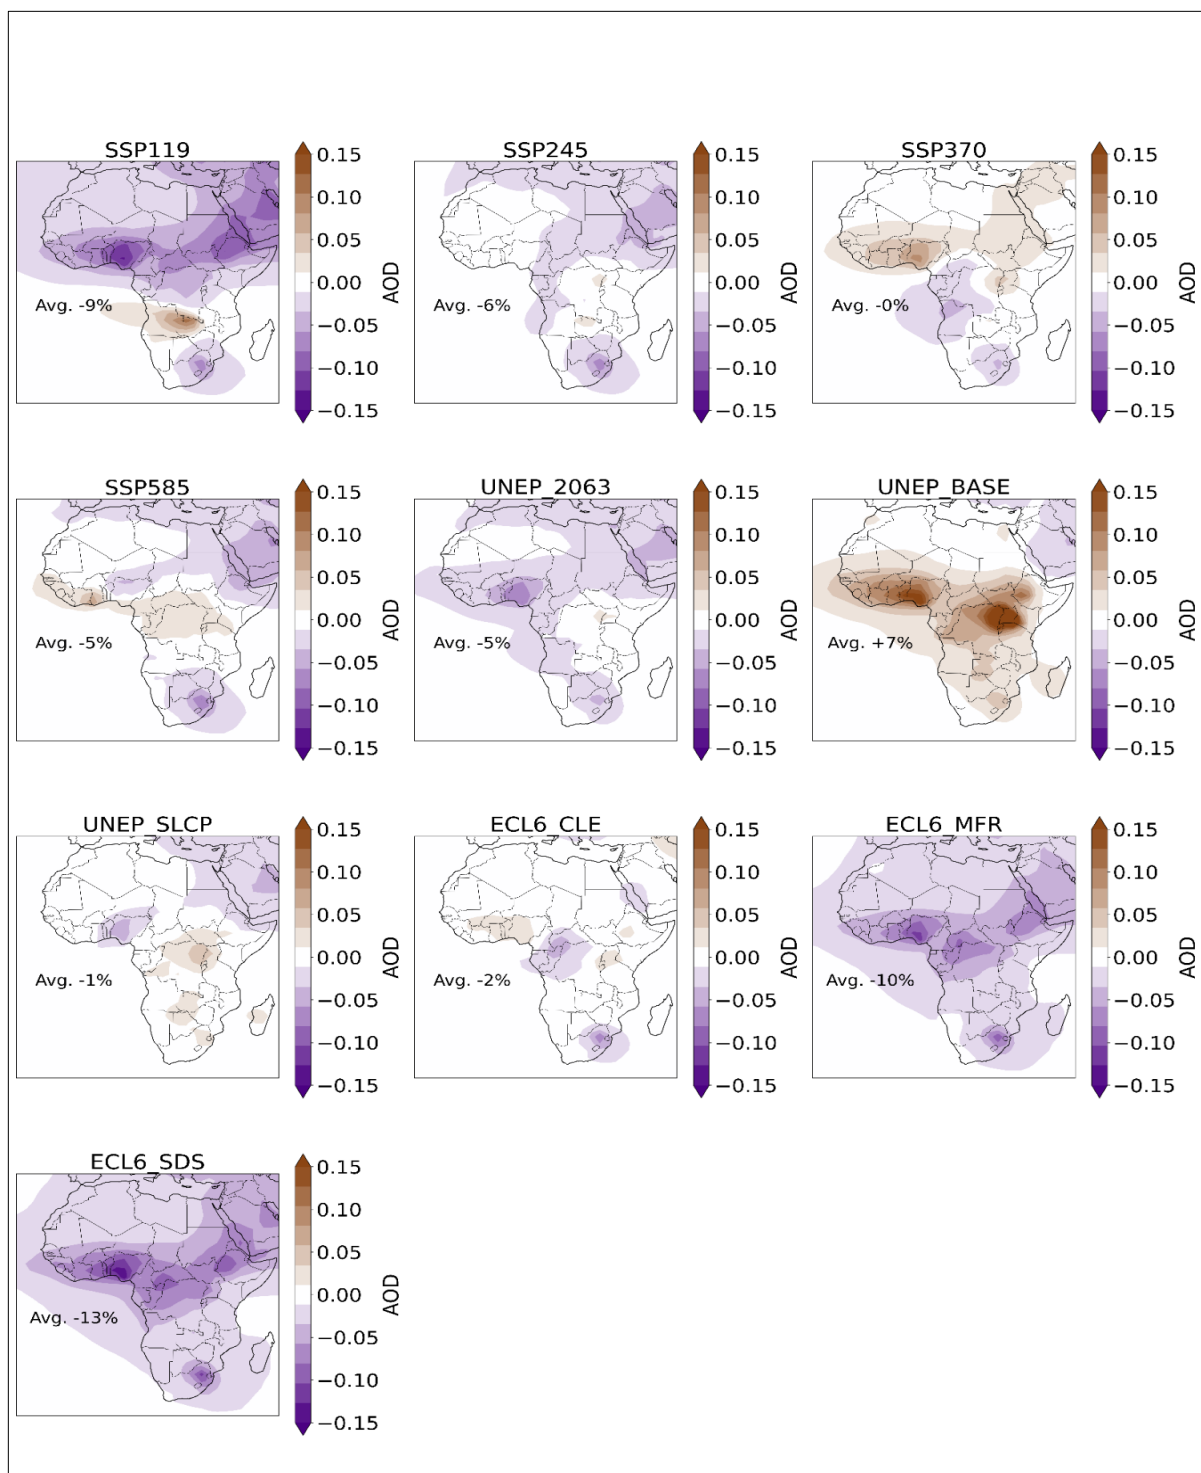

**Figure S13:** Difference in AOD between 2015-2018 and 2050 across all scenarios

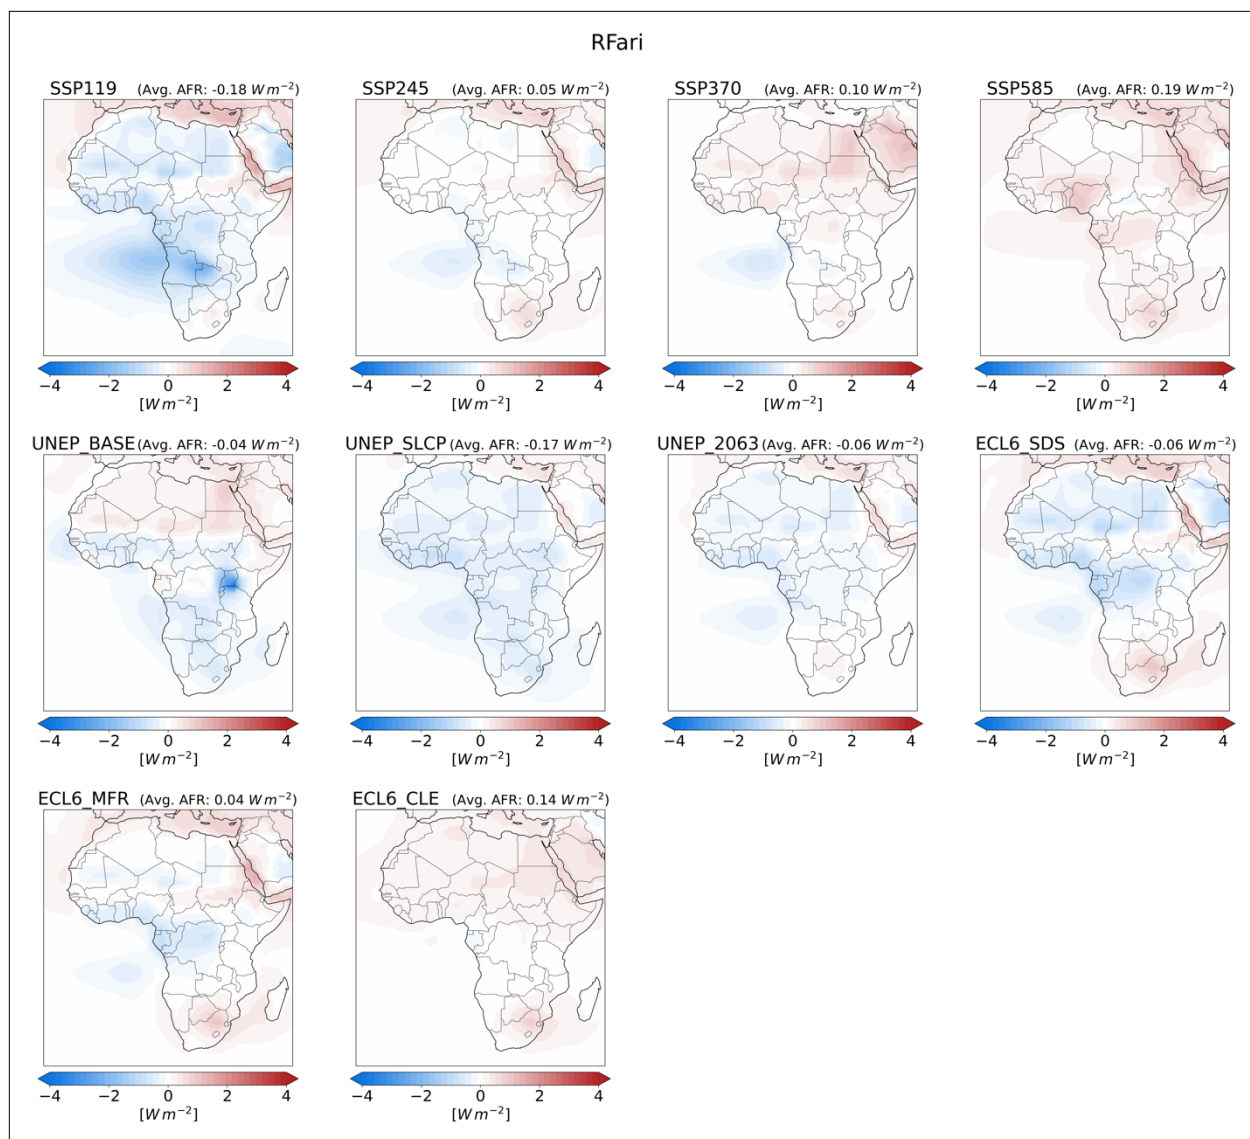

**Figure S14:** Radiative forcing from aerosol-radiation interactions due to changes in emissions between 2015-2018 and 2050.



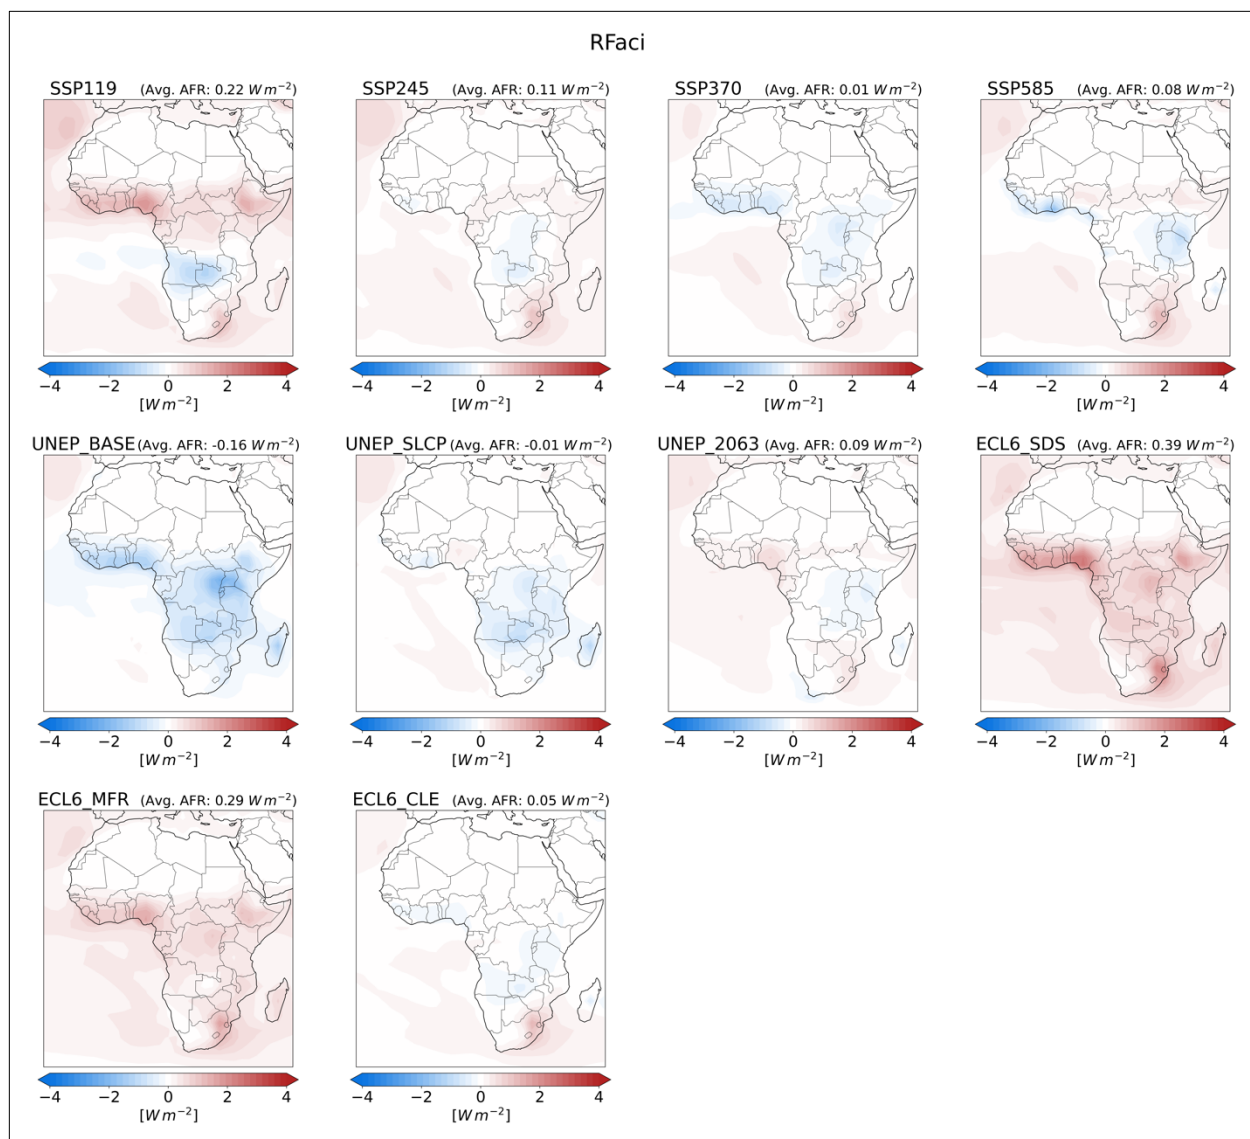

**Figure S15:** Radiative forcing from aerosol-cloud interactions due to changes in emissions between 2015-2018 and 2050.



**Table S3:** Regional changes in emissions, PM<sub>2.5</sub>, excess deaths, and radiative forcing across scenarios between 2015-2018 and 2050

| Region         | Scenario  | Emission (kt/yr) |       |       |                 | Annual PM2.5 (µg m <sup>-3</sup> ) | Excess deaths (in thousands) |
|----------------|-----------|------------------|-------|-------|-----------------|------------------------------------|------------------------------|
|                |           | BC               | SO2   | OC    | NO <sub>x</sub> |                                    |                              |
| Africa         | SSP585    | 733              | 1089  | -6202 | 7961            | -2.48                              | 455                          |
|                | SSP370    | 1143             | 2038  | 3654  | 6166            | 1.89                               | 835                          |
|                | SSP245    | 42               | 424   | 384   | 495             | -0.28                              | 710                          |
|                | SSP119    | -1992            | 5572  | -5715 | -3943           | -3.95                              | 370                          |
|                | ECL6 CLE  | 865              | -3150 | 2330  | 9228            | 0.82                               | 705                          |
|                | ECL6 MFR  | -1446            | -7011 | -5507 | -11785          | -3.60                              | 595                          |
|                | ECL6 SDS  | -2146            | -9561 | -6015 | -7598           | -4.54                              | 575                          |
|                | UNEP BASE | 2116             | 10550 | 5991  | 34082           | 3.64                               | 815                          |
|                | UNEP SLCP | -343             | 9095  | -656  | 4174            | -1.50                              | 665                          |
|                | UNEP 2063 | -629             | 1498  | -2054 | -680            | -2.66                              | 642                          |
| Western Africa | SSP585    | 294              | 2208  | -2224 | 3311            | -2.36                              | 130                          |
|                | SSP370    | 412              | 574   | 1416  | 2267            | 2.83                               | 310                          |
|                | SSP245    | 72               | 646   | 334   | 915             | 0.42                               | 275                          |
|                | SSP119    | -621             | -101  | -2048 | -233            | -4.71                              | 130                          |
|                | ECL6 CLE  | 230              | 498   | 694   | 2338            | 1.07                               | 270                          |
|                | ECL6 MFR  | -492             | -19   | -1742 | -1527           | -4.32                              | 250                          |
|                | ECL6 SDS  | -655             | -611  | -1948 | -945            | -5.41                              | 245                          |
|                | UNEP BASE | 592              | 1580  | 1763  | 9308            | 4.33                               | 305                          |
|                | UNEP SLCP | -252             | 1328  | -777  | 252             | -2.19                              | 255                          |
|                | UNEP 2063 | -336             | 786   | -1195 | -539            | -3.30                              | 250                          |
| Eastern Africa | SSP585    | 246              | 2561  | -1553 | 2969            | -2.69                              | 120                          |
|                | SSP370    | 277              | 472   | 933   | 1524            | 2.86                               | 280                          |
|                | SSP245    | 35               | 408   | 167   | 679             | 0.52                               | 235                          |
|                | SSP119    | -439             | 80    | -1408 | 178             | -4.29                              | 120                          |
|                | ECL6 CLE  | 277              | 268   | 702   | 2531            | 1.21                               | 240                          |
|                | ECL6 MFR  | -357             | -490  | -1412 | -1757           | -4.19                              | 200                          |
|                | ECL6 SDS  | -525             | -715  | -1553 | -896            | -5.17                              | 195                          |

|                            |           |      |       |       |       |       |     |
|----------------------------|-----------|------|-------|-------|-------|-------|-----|
|                            | UNEP BASE | 669  | 2549  | 1700  | 13563 | 6.01  | 280 |
|                            | UNEP SLCP | 25   | 2120  | 121   | 2371  | 0.25  | 235 |
|                            | UNEP 2063 | -31  | 1865  | -237  | 1419  | -0.89 | 225 |
| <b>Central<br/>Africa</b>  | SSP585    | 251  | 666   | -1325 | 1547  | -2.75 | 85  |
|                            | SSP370    | 242  | 906   | 977   | 1040  | 1.48  | 130 |
|                            | SSP245    | 30   | 1220  | 279   | 474   | -0.10 | 120 |
|                            | SSP119    | -385 | 4240  | -1168 | 144   | -4.44 | 80  |
|                            | ECL6 CLE  | 197  | 427   | 579   | 2018  | 0.79  | 115 |
|                            | ECL6 MFR  | -351 | 22    | -1371 | -1319 | -4.11 | 95  |
|                            | ECL6 SDS  | -463 | -707  | -1481 | -739  | -5.19 | 90  |
|                            | UNEP BASE | 455  | 811   | 1567  | 4997  | 2.16  | 130 |
|                            | UNEP SLCP | 58   | 803   | 280   | 1485  | -1.92 | 115 |
|                            | UNEP 2063 | -21  | 258   | -89   | 485   | -3.29 | 110 |
| <b>Southern<br/>Africa</b> | SSP585    | -72  | -3085 | -972  | -250  | -3.07 | 5   |
|                            | SSP370    | 30   | -1287 | 213   | 359   | -0.63 | 15  |
|                            | SSP245    | -109 | -1927 | -226  | -1491 | -1.66 | 10  |
|                            | SSP119    | -348 | 3138  | -864  | -1936 | -2.74 | 5   |
|                            | ECL6 CLE  | 26   | -3897 | 170   | 693   | -0.28 | 10  |
|                            | ECL6 MFR  | -236 | -5018 | -735  | -3032 | -2.44 | 0   |
|                            | ECL6 SDS  | -312 | -5887 | -782  | -2266 | -2.98 | 0   |
|                            | UNEP BASE | 220  | 3734  | 666   | 3992  | 1.09  | 20  |
|                            | UNEP SLCP | -45  | 3340  | -107  | 1140  | -1.34 | 10  |
|                            | UNEP 2063 | -100 | -1213 | -298  | -218  | -2.71 | 7   |
| <b>Northern<br/>Africa</b> | SSP585    | 13   | -1261 | -128  | 383   | -1.05 | 35  |
|                            | SSP370    | 183  | 1372  | 116   | 974   | 2.28  | 100 |
|                            | SSP245    | -71  | -771  | -170  | -81   | -1.54 | 70  |
|                            | SSP119    | -199 | -1786 | -228  | -2097 | -2.83 | 35  |
|                            | ECL6 CLE  | 137  | -445  | 185   | 1648  | 1.37  | 70  |
|                            | ECL6 MFR  | -10  | -1507 | -248  | -4151 | -2.00 | 50  |
|                            | ECL6 SDS  | -190 | -1641 | -251  | -2751 | -2.99 | 45  |
|                            | UNEP BASE | 180  | 1875  | 295   | 2222  | 3.03  | 80  |

|  |           |      |      |      |       |       |    |
|--|-----------|------|------|------|-------|-------|----|
|  | UNEP SLCP | -129 | 1504 | -172 | -1074 | -1.31 | 50 |
|  | UNEP 2063 | -141 | -198 | -234 | -1828 | -2.52 | 50 |
